# Supplementary material for: Endemism and diversity of small mammals along two neighboring Bornean mountains
Source: PeerJ. 2019 Oct 8;7:e7858. doi: 10.7717/peerj.7858 (PMC6788440; doi:10.7717/peerj.7858)
Supplement: Supplemental Information 1 [file peerj-07-7858-s001.xlsx]

## Sheet: Readme
Supplementary File S1. Data of animals sampled and trapping effort
This supplement includes 2 tables:
Table S1.1. Raw data about the animals sampled. It includes data about the following:
	FieldCode	unique code assigned to animals in the field.
	Species	species ID as determined with Payne et al. 2007.
	TrapID	ID that identifies a given trap in a given location. Whenever the location of a trap was changed a new ID was assigned. It links Tables S1.1 and S1.2.
	Location	mountain where the animal was caught.
	Latitude	latitude in decimal degrees. Original coordinates were obtained from a GPS over the trap placement. For some traps the coordinates were extrapollated from adyacent traps within the same transect or campsite coordinates.
	Longitude	longitude in decimal degrees. Original coordinates were obtained from a GPS over the trap placement. For some traps the coordinates were extrapollated from adyacent traps within the same transect or campsite coordinates.
	DEM elevation	elevation extracted from a SRTM Digital Elevation Model with 1-arcsecond resolution (earthexplorer.usgs.gov) given the coordinates (Lat/Lon) of the trap location.
	Transect altitude	categorical. Transect elevation.
	Date collected	date the animal was sampled/collected.
	Trap type	either Sherman, Tomahawk or pitfall trap.
	Collector	person who sampled/collected the animal.
	Specimen collected	whether a specimen was collected. Specimens have been deposited at the Doñana Biological Station (Spain) and in Sabah Parks (Kota Kinabalu). For codes BOR001-BOR230, specimens were skinned in the field: skins were fixed in formol and carcasses were preserved in ethanol 70%. For BOR250 and above, specimens a longitudinal cut was made in the abdomen, from which the skin was partially sepparated fro…
Table S1.2. Raw data about the trapping effort. It includes data about the following:
	TrapID	ID that identifies a given trap in a given location. Whenever the location of a trap was changed a new ID was assigned. It links Tables S1.1 and S1.2.
	Transect	transect number.
	Trap number	trap number for a given transect.
	Trap type	type of trap used: pitfall, Tomahawk, box trap local made, Sherman.
	Latitude	latitude in decimal degrees. Original coordinates were obtained from a GPS over the trap placement. For some traps the coordinates were extrapollated from adyacent traps within the same transect or campsite coordinates.
	Longitude	longitude in decimal degrees. Original coordinates were obtained from a GPS over the trap placement. For some traps the coordinates were extrapollated from adyacent traps within the same transect or campsite coordinates.
	Date_set	date the trap was set.
	Date_closed	date the trap was closed.
	Location	mountain where the trap was set.
	Habitat	habitat where the trap was set.
	DEM elevation	elevation extracted from a SRTM Digital Elevation Model with 1-arcsecond resolution (earthexplorer.usgs.gov) given the coordinates (Lat/Lon) of the trap location.
	Trap nights	number of days the trap was active (Date_closed-Date_set).
	Transect altitude	categorical. Transect elevation.

## Sheet: TableS1.1.AnimalsSampled
FieldCode

## Sheet: TableS1.2.TrappingEffort
TrapID
